# Supplementary material for: Binding of SARS-CoV Covalent Non-Covalent Inhibitors to the SARS-CoV-2 Papain-Like Protease and Ovarian Tumor Domain Deubiquitinases
Source: MDPI journal article supplement (doi:10.3390/biom11060802), 2021-05-28
Supplement: s1 [file s1]

# **Binding of SARS-CoV Covalent Inhibitors to the SARS-CoV2 Papain-like Protease and Ovarian Tumor Domain Deubiquitinases**

**Dakshinamurthy Sivakumar <sup>†</sup> and Matthias Stein <sup>\*</sup>**

Molecular Simulations and Design Group, Max Planck Institute for Dynamics of Complex Technical Systems, University, Sandtorstrasse 1, 39106 Magdeburg, Germany; [sivakumar@mpi-magdeburg.mpg.de](mailto:sivakumar@mpi-magdeburg.mpg.de)

<sup>\*</sup> Correspondence: [matthias.stein@mpi-magdeburg.mpg.de](mailto:matthias.stein@mpi-magdeburg.mpg.de)

<sup>†</sup> Current address: R&D Center, Pharmcadd, 221, 17 APEC-ro, Haeundae-gu, Busan 48060, Korea

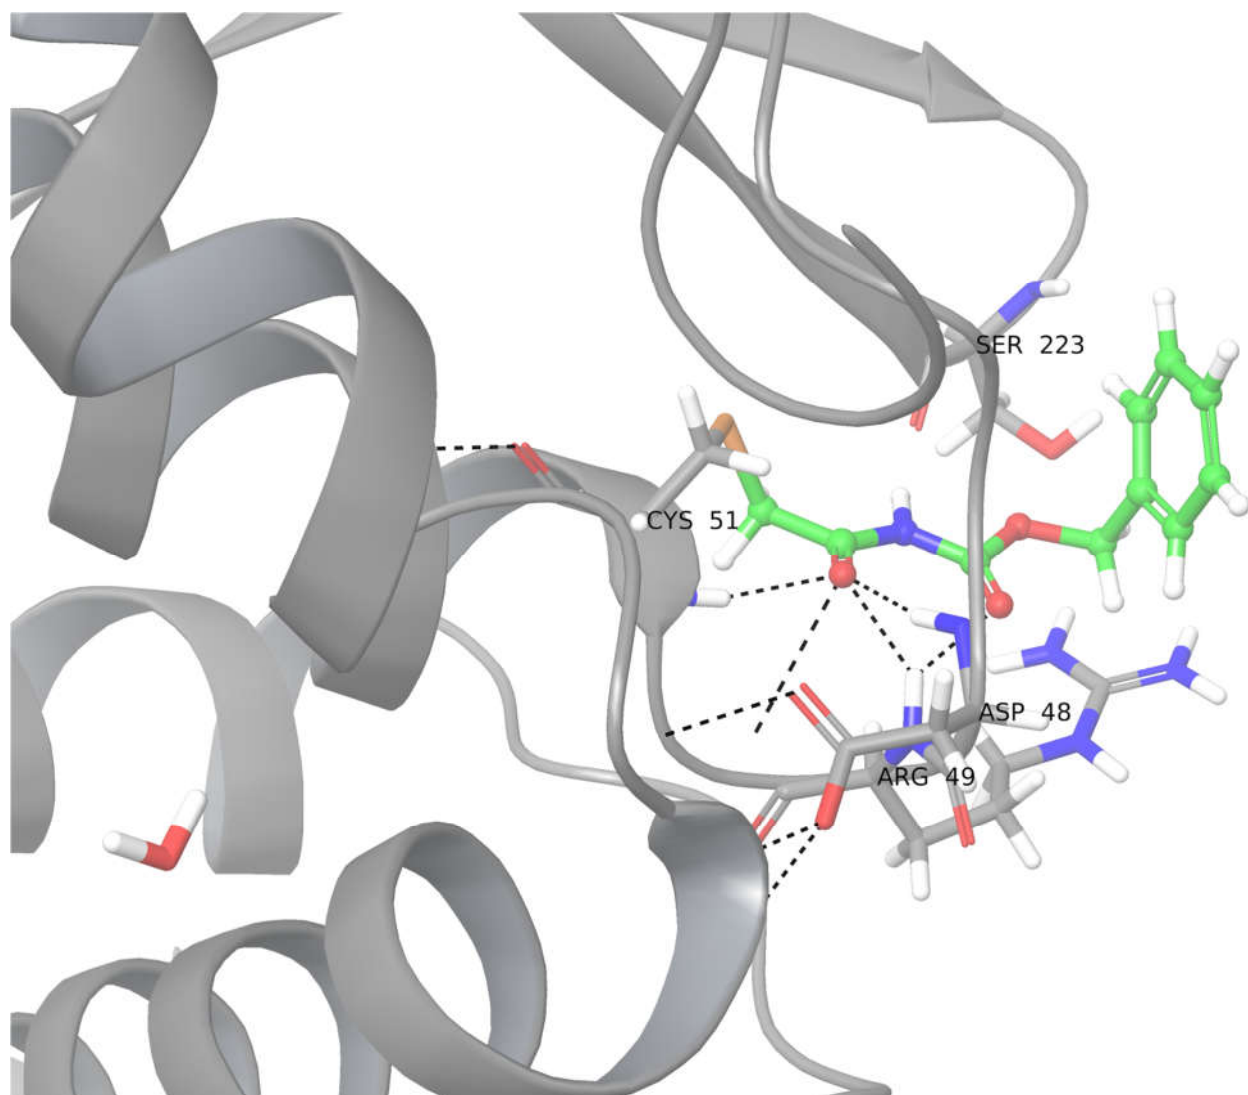

**Figure S1.** Dominating molecular interactions observed during the molecular dynamics simulation of the complex Otub-2 with compound PCM-0102153 (benzyl acetylcarbamate) (Pdb id 5QIP). The covalent ligand is represented as ball and sticks and the interacting residues as sticks.

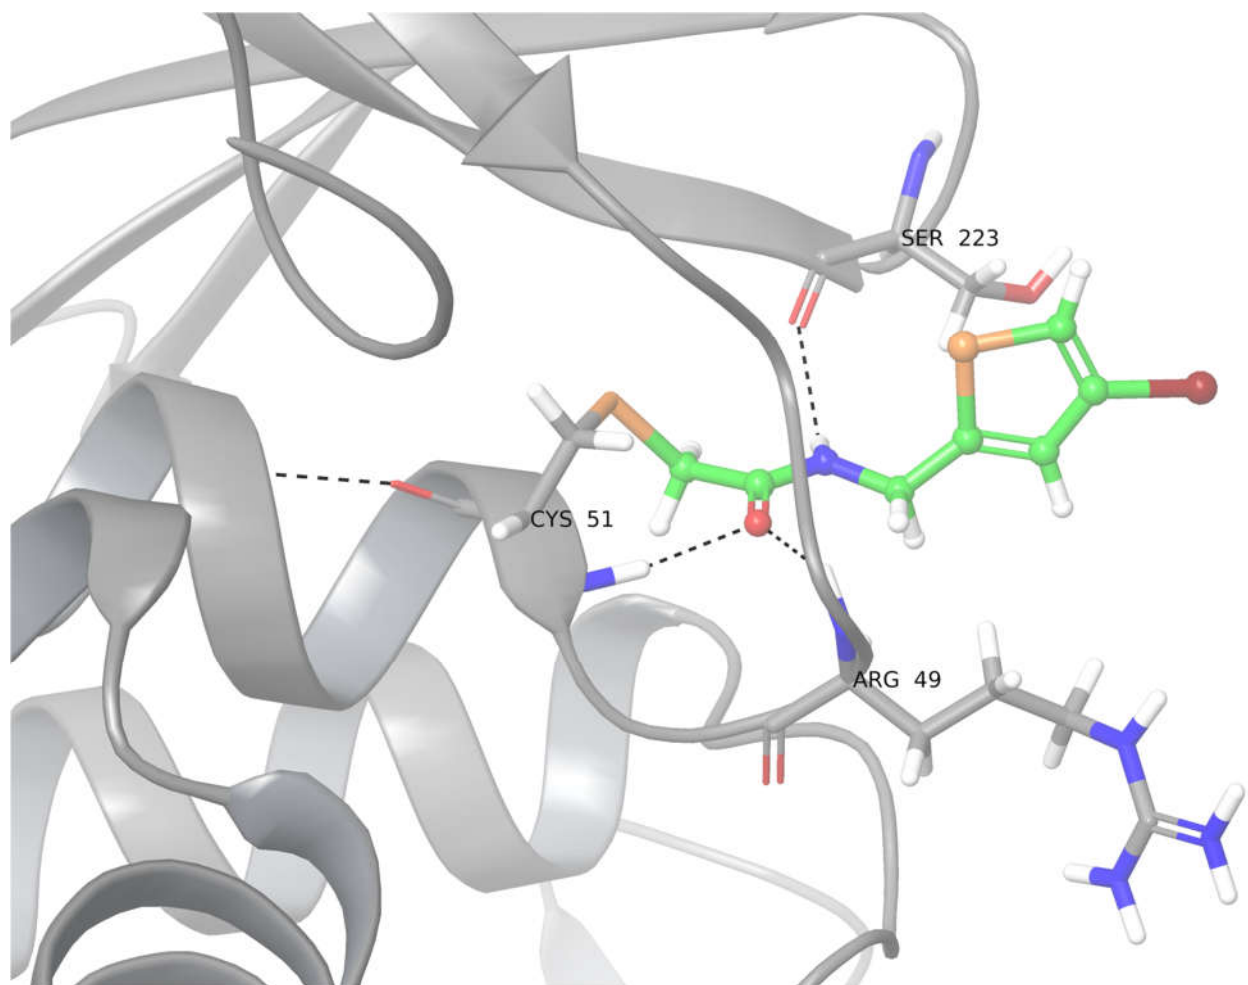

**Figure S2.** Dominating molecular interaction observed during the molecular dynamics simulation of the complex Otub-2 with compound PCM-0103050 (N-[(4-bromothiophen-2-yl)-methyl] acetamide) - pdb id 5QIQ. The covalent ligand is represented as ball and sticks and the interacting residues as sticks.

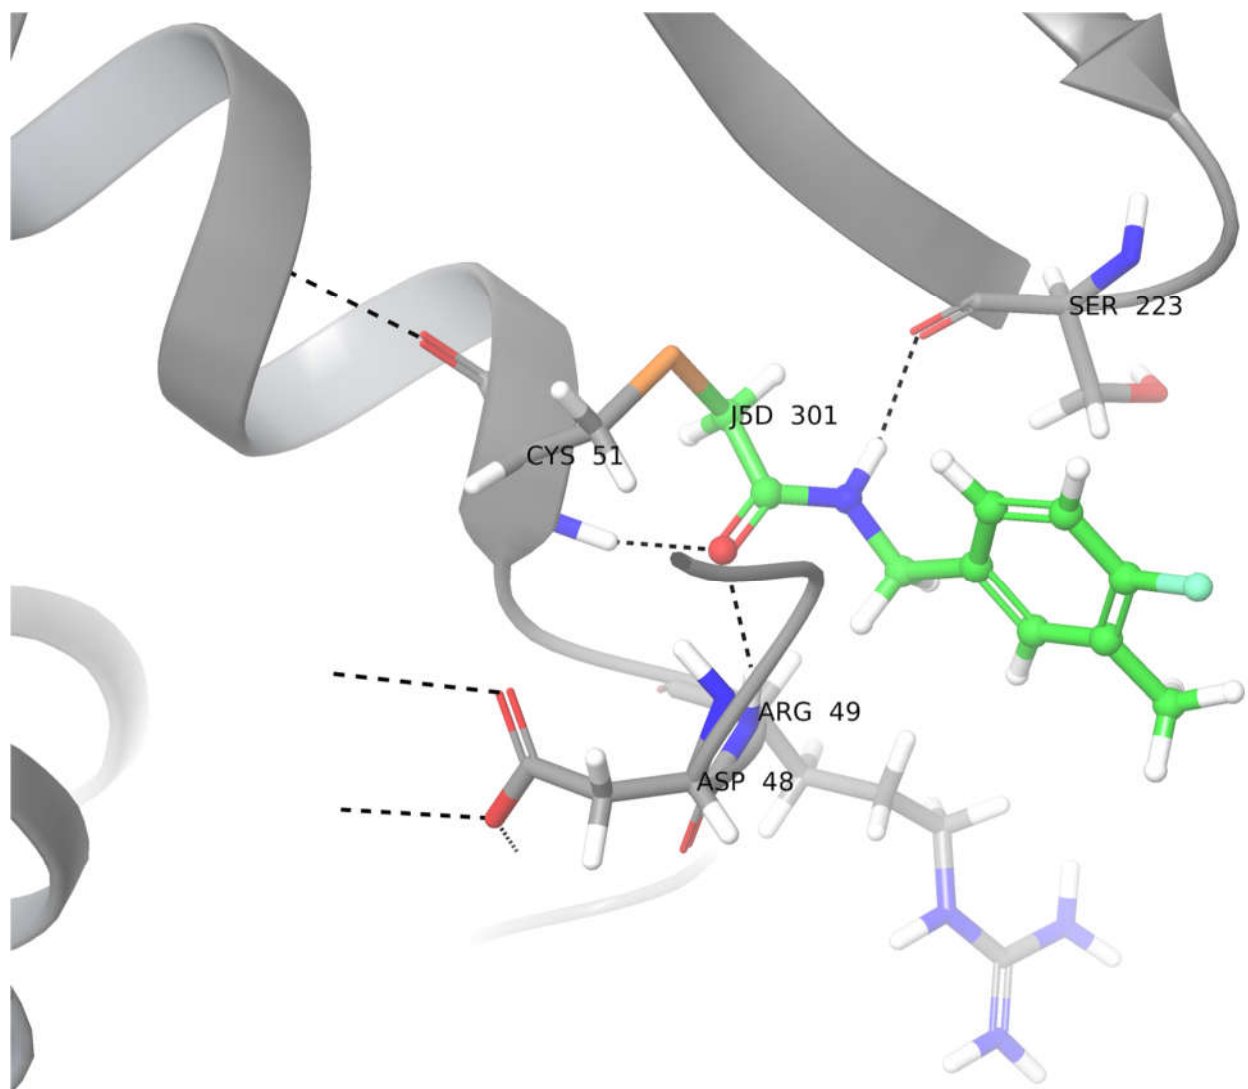

**Figure S3.** Dominating molecular interaction observed during the molecular dynamics simulation of the complex Otub-2 with compound PCM-0102305 (N-[(4-fluoro-3-methylphenyl)-methyl] acetamide) - pdb id 5QIR. The covalent ligand is represented as ball and sticks and the interacting residues as sticks.

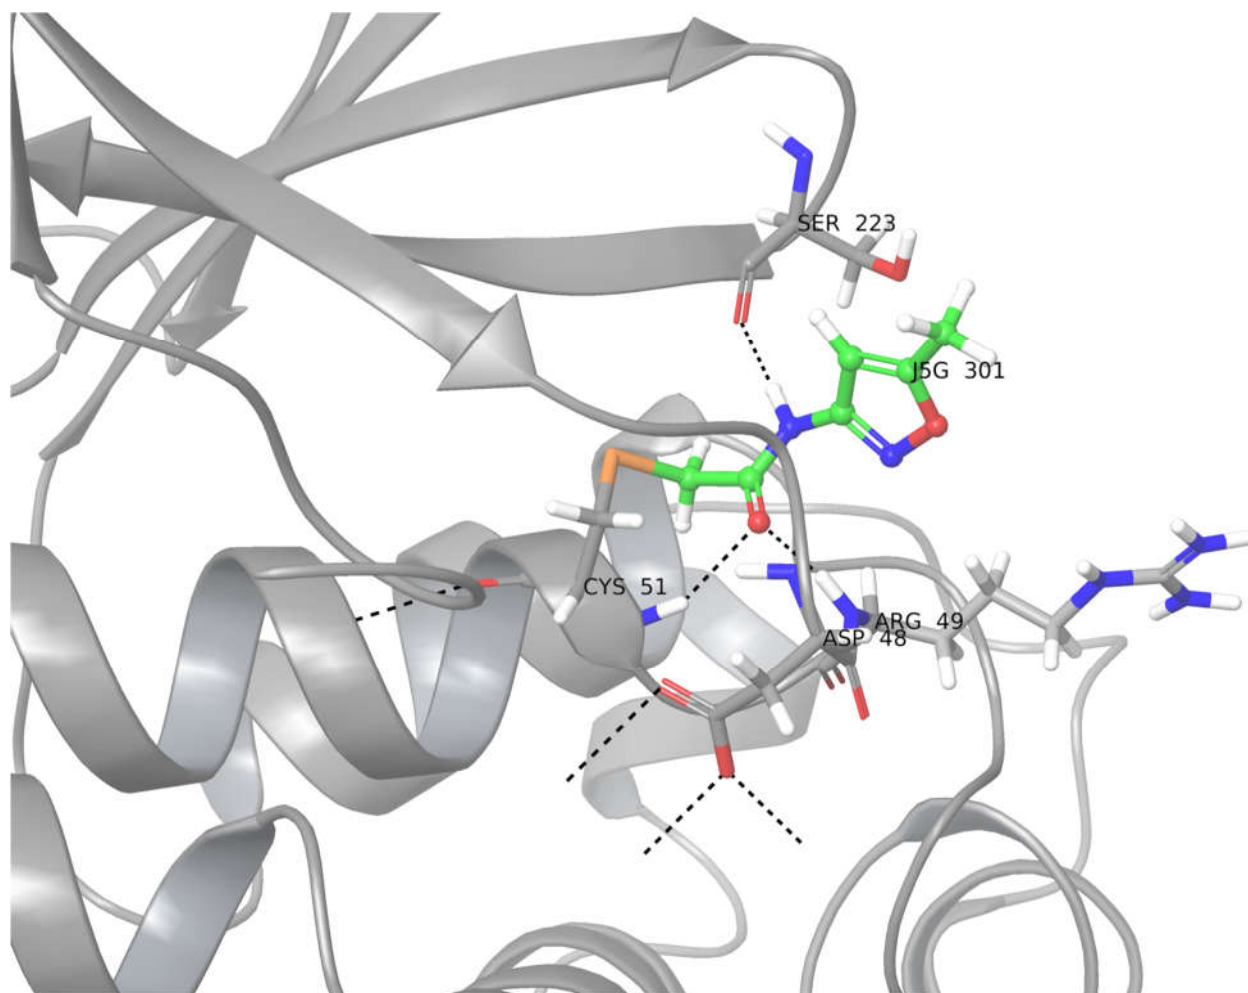

**Figure S4.** Dominating molecular interaction observed during the molecular dynamics simulation of the complex Otub-2 with compound PCM-0102500 (N-(5-methyl-1,2-oxazol-3-yl)acetamide) - pdb id 5QIS. The covalent ligand is represented as ball and sticks and the interacting residues as sticks.

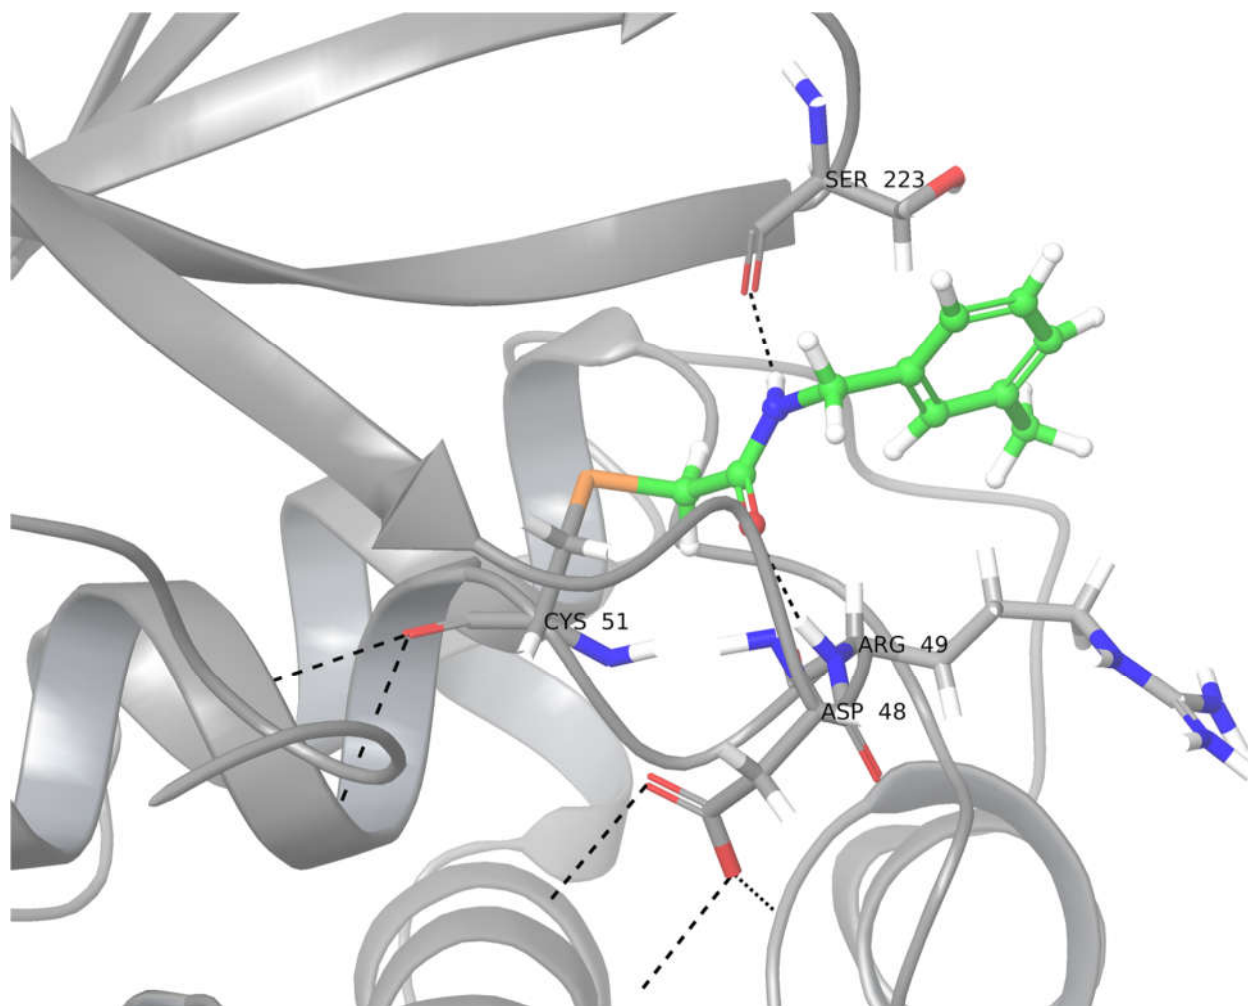

**Figure S5.** Dominating molecular interaction observed during the molecular dynamics simulation of the complex Otub-2 with compound PCM-0102821 (N-[(E)-(3-methylphenyl) methylidene] acetamide) - pdb id 5QIT. The covalent ligand is represented as ball and sticks and the interacting residues as sticks.

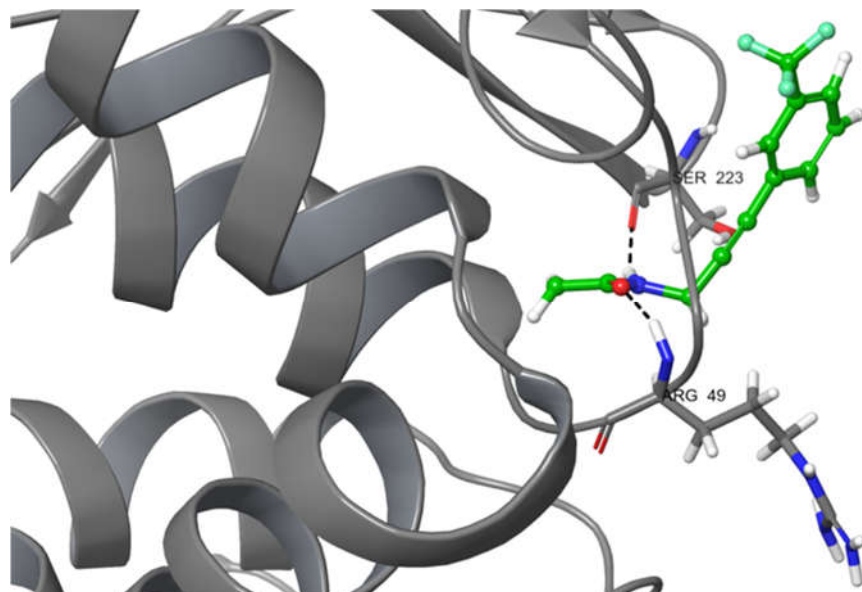

**Figure S6.** Dominating molecular interaction observed during the molecular dynamics simulation of the complex Otub-2 with compound PCM-0103011 (N-{3-[3-(trifluoromethyl)phenyl]prop-2-yn-1-yl}acetamide) - pdb id 5QIU. The covalent ligand is represented as ball and sticks and the interacting residues as sticks.

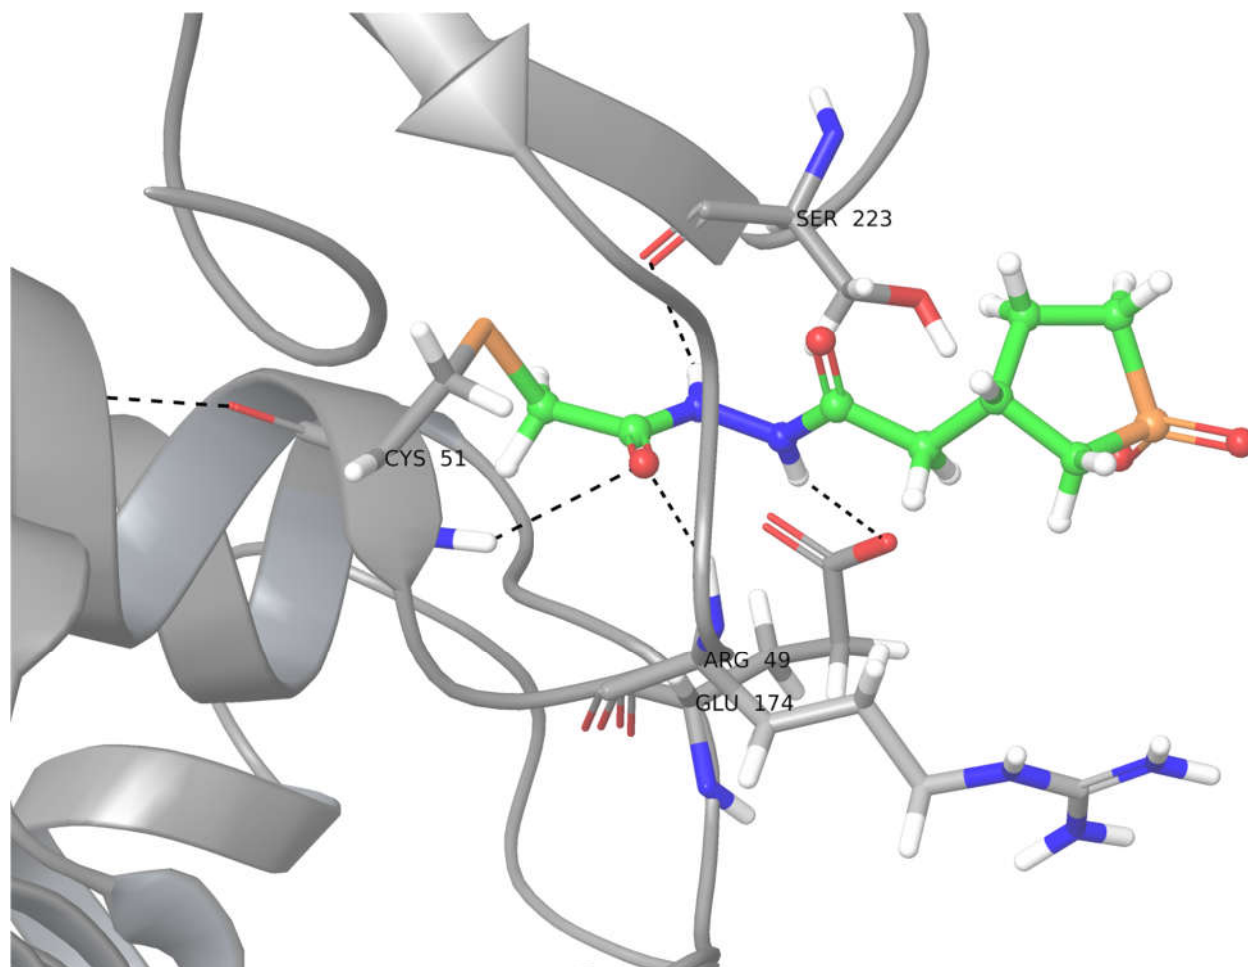

**Figure S7.** Dominating molecular interaction observed during the molecular dynamics simulation of the complex Otub-2 with compound PCM-0102998 (N'-acetyl-2-[(3R)-1,1-dioxo-1λ<sup>6</sup>-thiolan-3-yl]acetohydrazide) - pdb id 5QIV. The covalent ligand is represented as ball and sticks and the interacting residues as sticks.



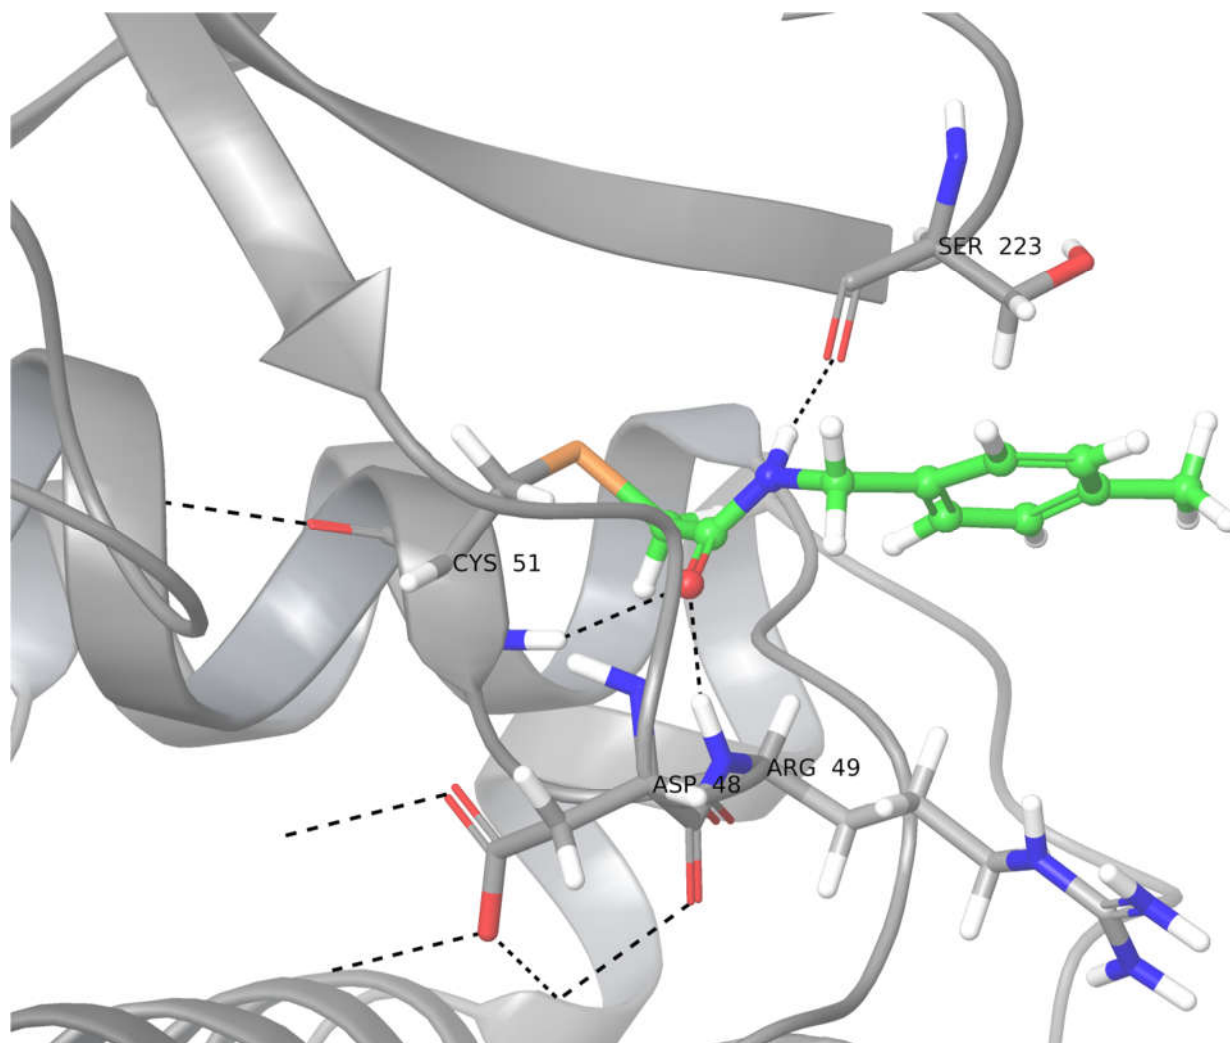

**Figure S8.** Dominating molecular interaction observed during the molecular dynamics simulation of the complex Otub-2 with compound PCM-0102660 (N-[(E)-(4-methylphenyl)methylidene] acetamide) - pdb id 5QIW. The covalent ligand is represented as ball and sticks and the interacting residues as sticks.



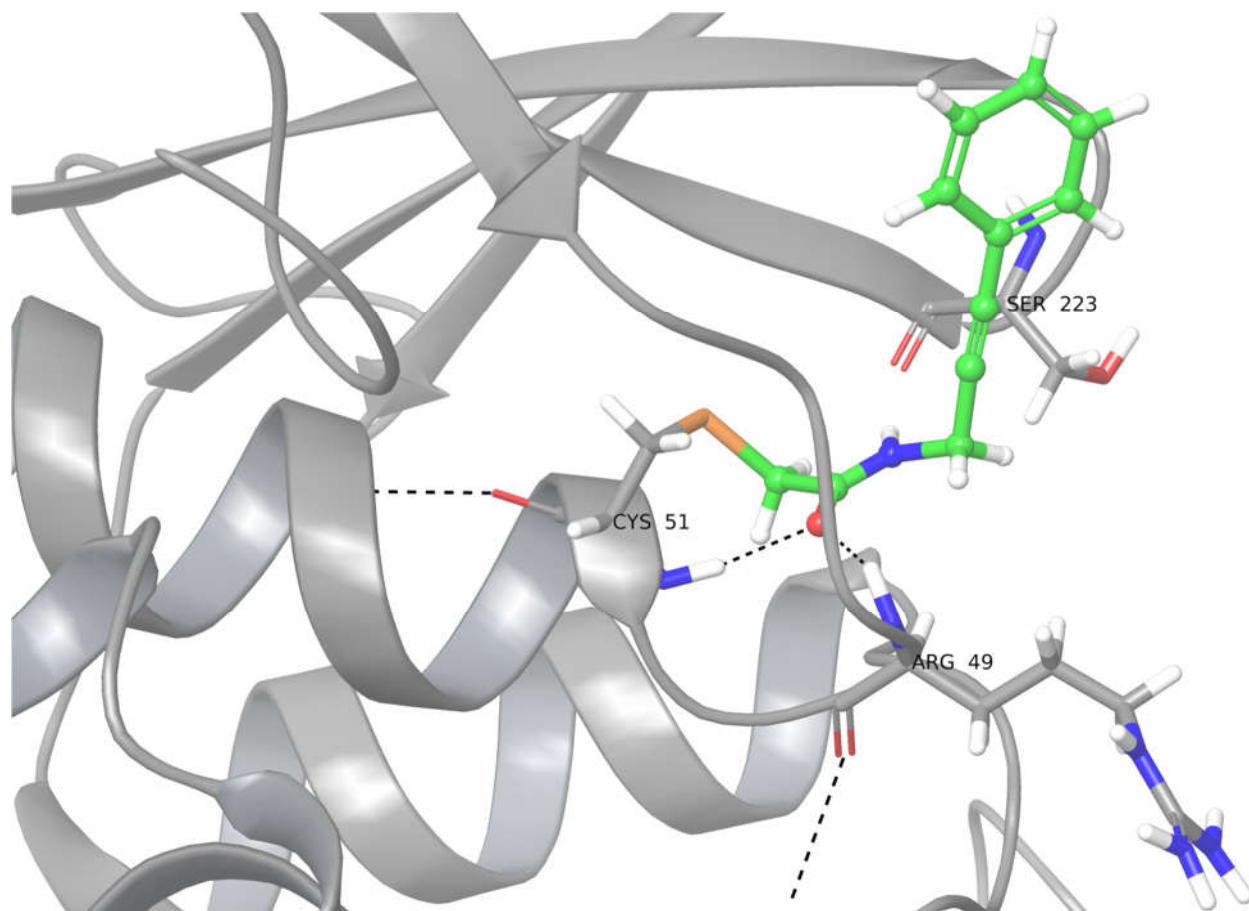

**Figure S9.** Dominating molecular interaction observed during the molecular dynamics simulation of the complex Otub-2 with compound PCM-0103007 (N-(3-phenylprop-2-yn-1-yl)acetamide) - pdb id 5QIX. The covalent ligand is represented as ball and sticks and the interacting residues as sticks.

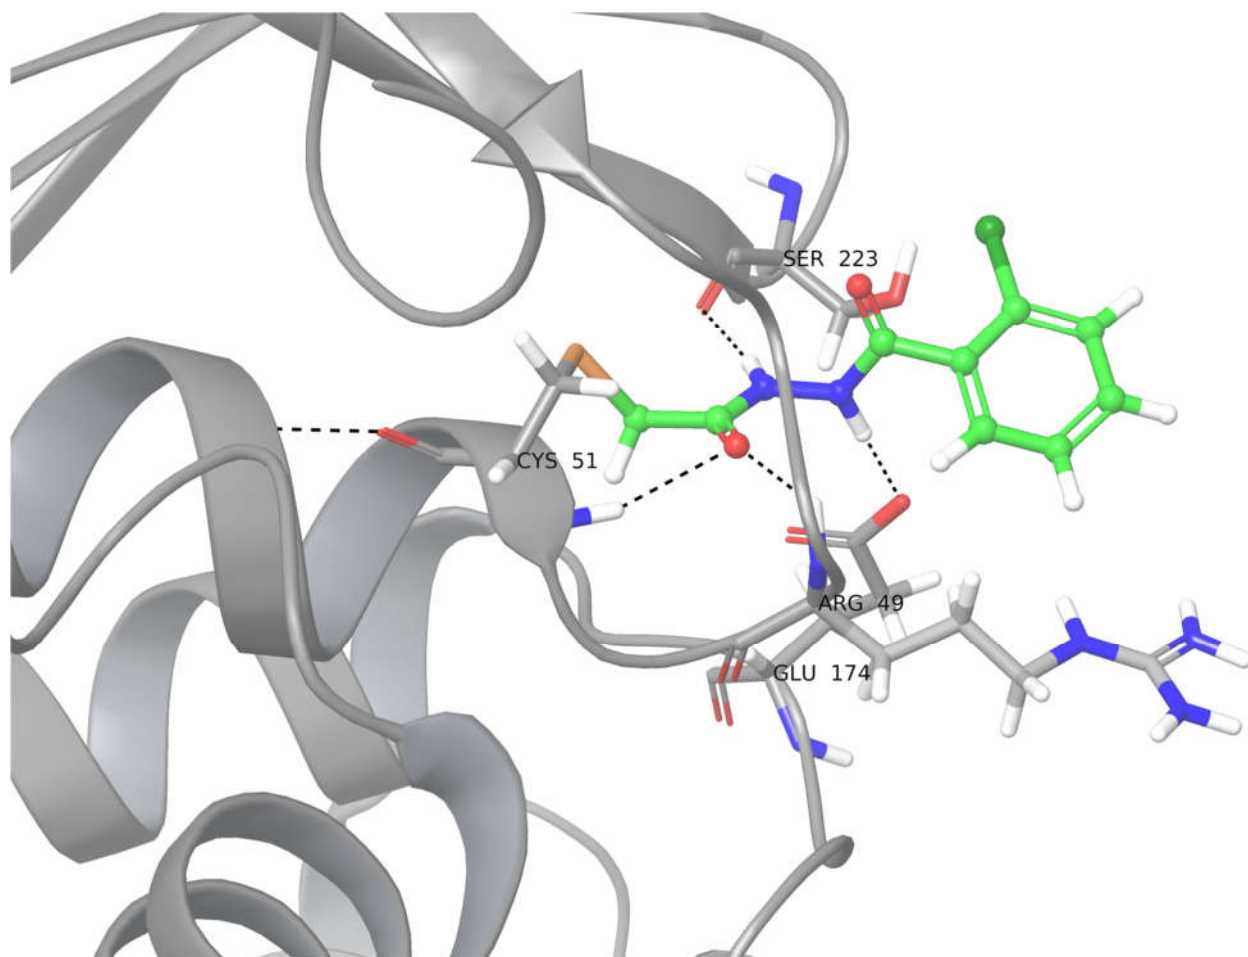

**Figure S10.** Dominating molecular interaction observed during the molecular dynamics simulation of the complex Otub-2 with compound PCM-0102954 (N'-acetyl-2-chlorobenzohydrazide) - pdb id 5QIY. The covalent ligand is represented as ball and sticks and the interacting residues as sticks.

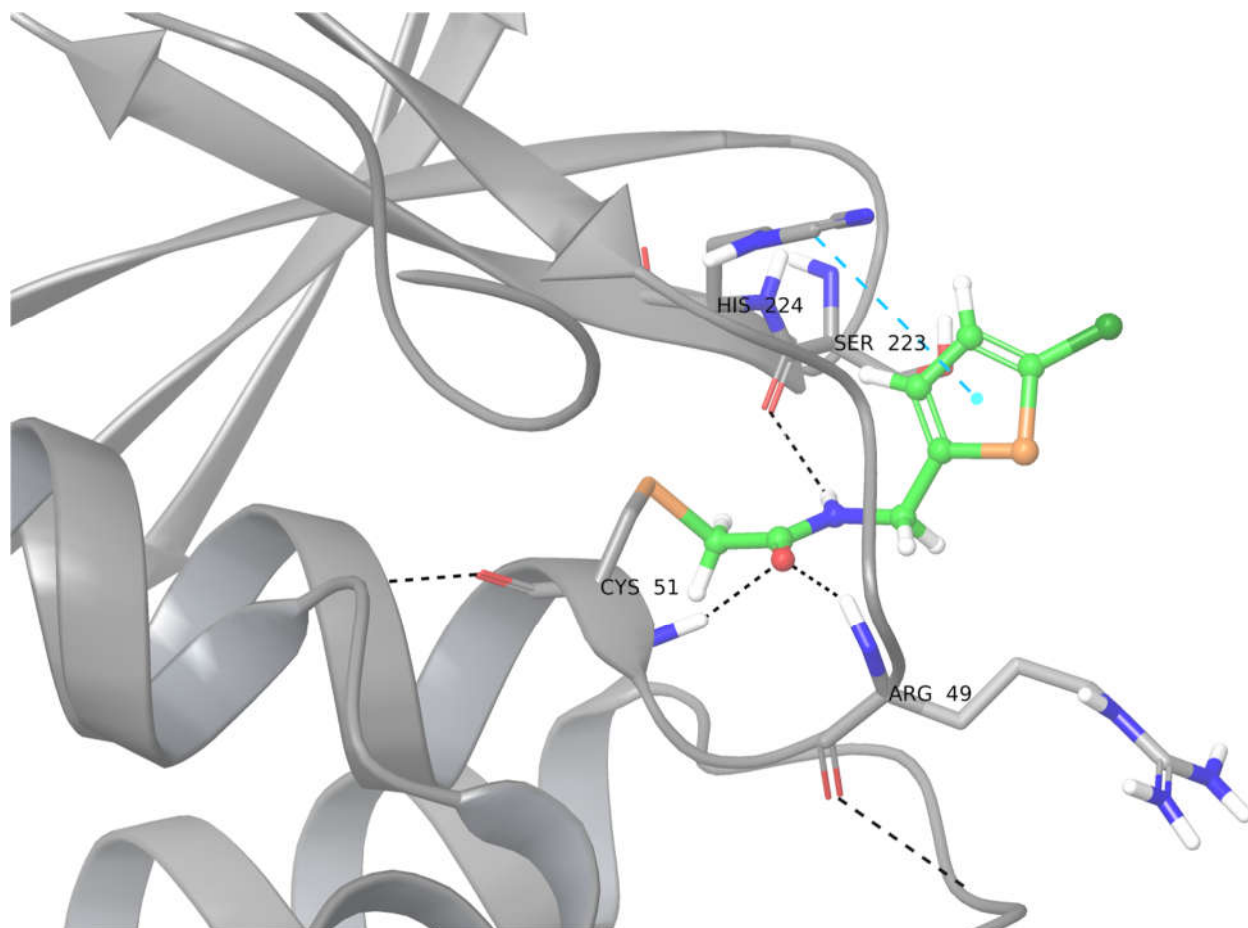

**Figure S11.** Dominating molecular interactions observed during the molecular dynamics simulation of the complex Otub-2 with compound PCM-0103080 (N-[(5-chlorothiophen-2-yl) methyl] acetamide) - pdb id 5QIZ. The covalent ligand is represented as ball and sticks and the interacting residues as sticks.

**Table S1.** Covalent selective inhibitors of the OTUB2 DUB. Comparison of co-crystallized ligand with MD refined structures.

| PDB ID | Ligand 2D Structure                                                                                    | Ligand RMSD (Å) | Covalent Protein-OTUB2 Complex <sup>a</sup>                                          |
|--------|--------------------------------------------------------------------------------------------------------|-----------------|--------------------------------------------------------------------------------------|
| 5QIP   | <p>PCM-0102153</p> 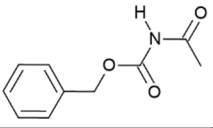 | 1.23±0.3        |  |
| 5QIQ   | <p>PCM-0103050</p>  | 1.05±0.3        |  |
| 5QIR   | <p>PCM-0102305</p>  | 1.09±0.2        |  |

|      |                                                                                                           |          |                                                                                      |
|------|-----------------------------------------------------------------------------------------------------------|----------|--------------------------------------------------------------------------------------|
| 5QIS | <b>PCM-0102500</b><br>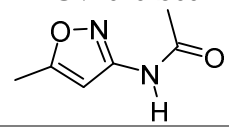   | 0.35±0.1 |    |
| 5QIT | <b>PCM-0102821</b><br>   | 1.02±0.4 |    |
| 5QIU | <b>PCM-0103011</b><br>   | 1.10±0.4 |    |
| 5QIV | <b>PCM-0102998</b><br>   | 0.82±0.2 |    |
| 5QIW | <b>PCM-0102660</b><br>   | 0.74±0.2 |    |
| 5QIX | <b>PCM-0103007</b><br> | 0.44±0.2 |  |
| 5QIY | <b>PCM-0102954</b><br> | 0.65±0.5 |  |
| 5QIZ | <b>PCM-0103080</b><br> | 1.29±0.1 |  |

<sup>a</sup>Binding and orientation of covalently-bound OTUB2 inhibitors (grey: X-ray structure; color: MD refined)

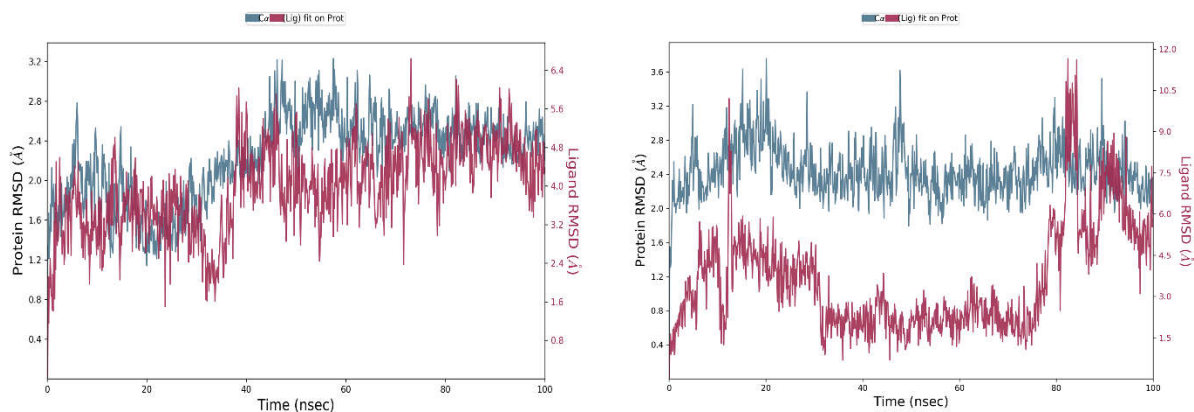

**Figure S12.** Molecular Dynamics studies of SARS-Cov-2 PIPro to show the RMSD of protein and Ligand over time for Compound 1 (left) and Compound 2 (right).

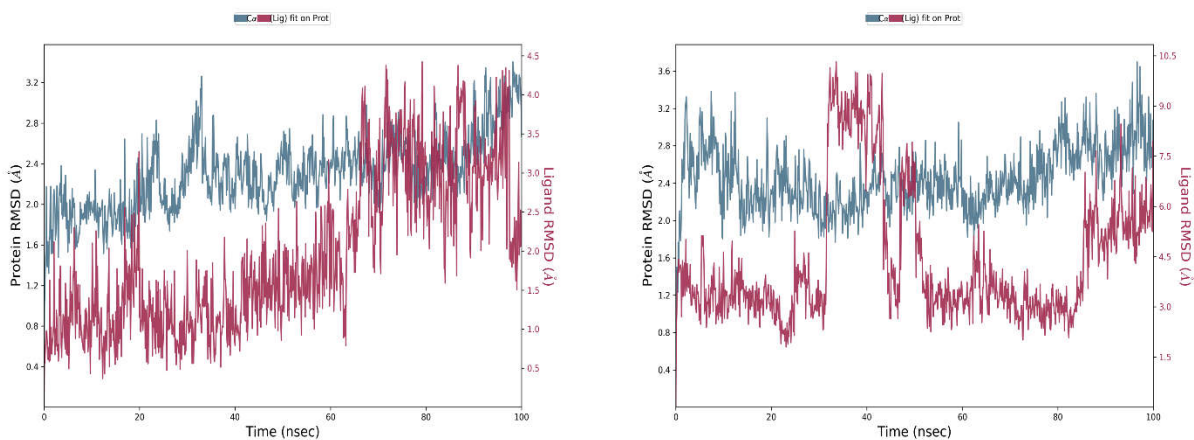

**Figure S13.** Molecular Dynamics studies of SARS-Cov-2 PIPro to show the RMSD of protein and Ligand over time for Compound 3 (left) and Compound 4 (right).

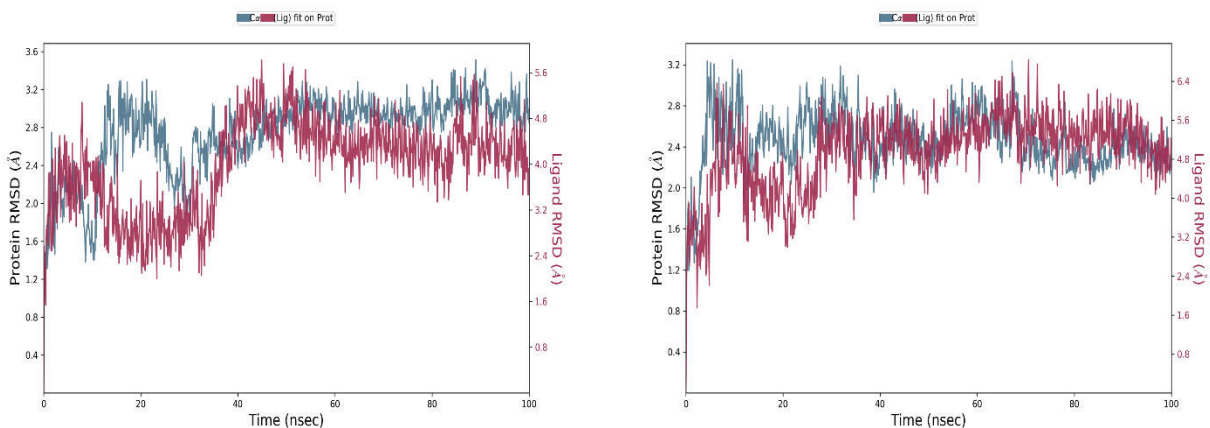

**Figure S14.** Molecular Dynamics studies of SARS-Cov-2 PIPro to show the RMSD of protein and Ligand over time for Compound 5 (left) and Compound 6 (right).



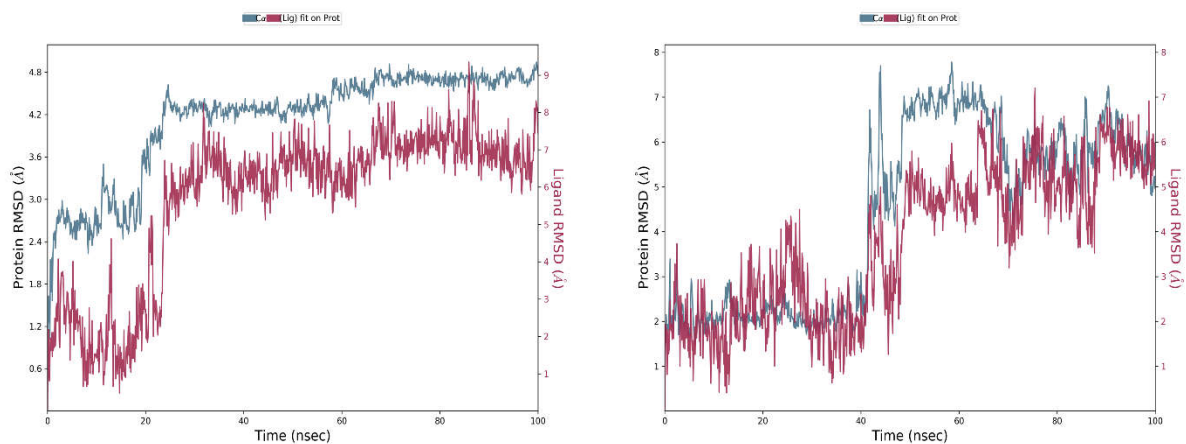

**Figure S15.** Molecular Dynamics studies of OTUB-1 to show the RMSD of protein and Ligand over time for Compound 1 (left) and Compound 2 (right).

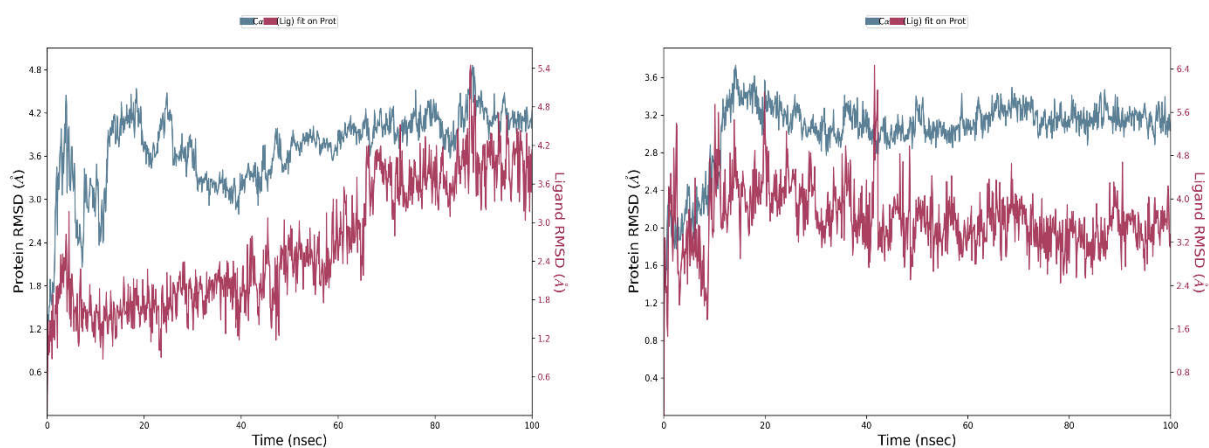

**Figure S16.** Molecular Dynamics studies of OTUB-1 to show the RMSD of protein and Ligand over time for Compound 3 (left) and Compound 4 (right).

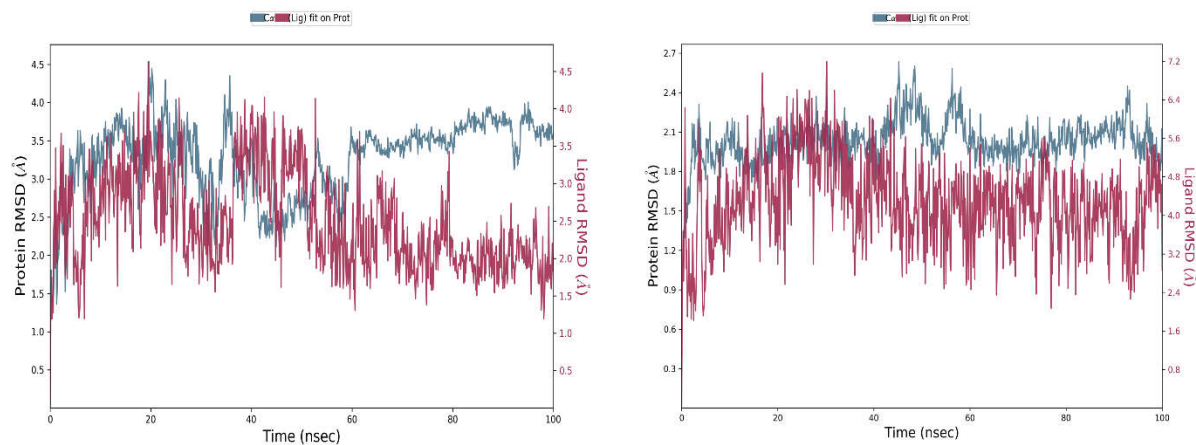

**Figure S17.** Molecular Dynamics studies of OTUB-1 to show the RMSD of protein and Ligand over time for Compound 5 (left) and Compound 6 (right).

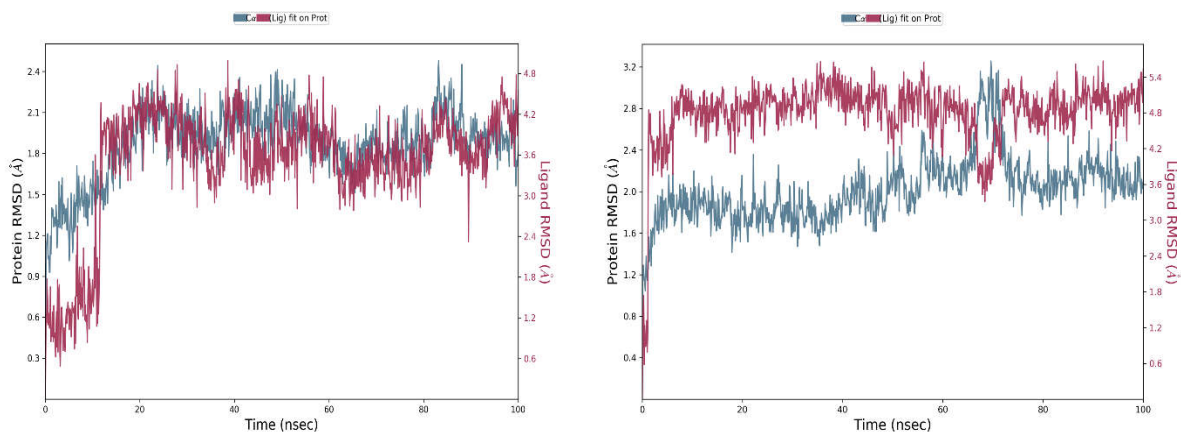

**Figure S18.** Molecular Dynamics studies of OTUB-2 to show the RMSD of protein and Ligand over time for Compound 1 (left) and Compound 2 (right).

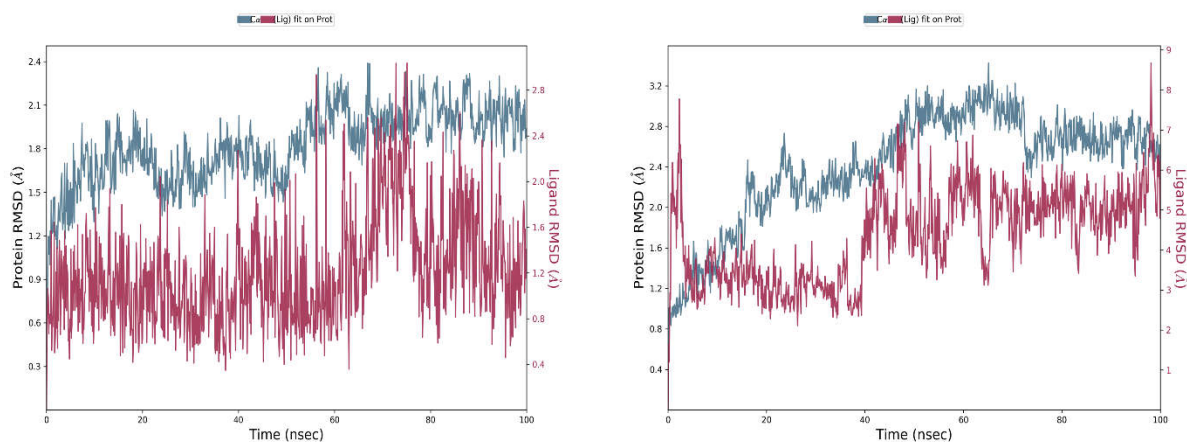

**Figure S19.** Molecular Dynamics studies of OTUB-2 to show the RMSD of protein and Ligand over time for Compound 3 (left) and Compound 4 (right).

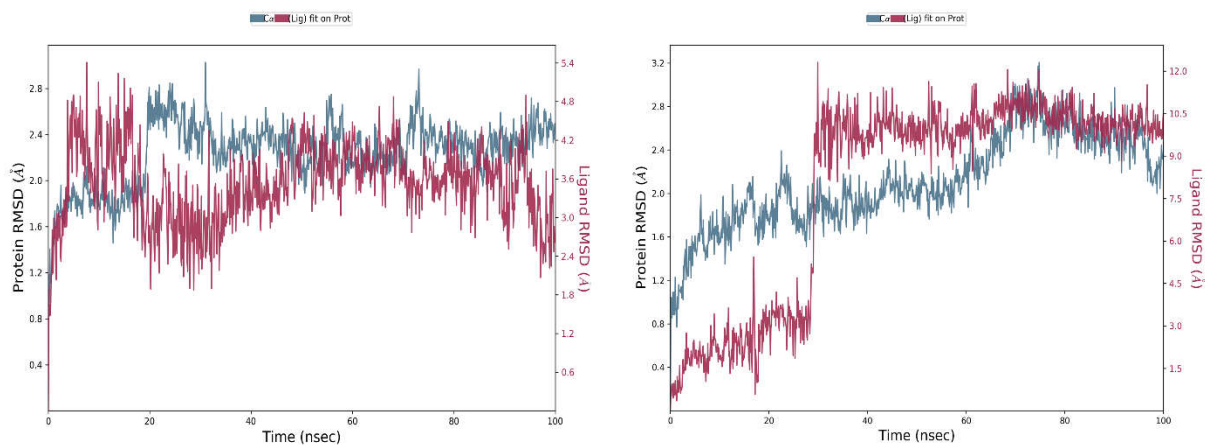

**Figure S20.** Molecular Dynamics studies of OTUB-2 to show the RMSD of protein and Ligand over time for Compound 5 (left) and Compound 6 (right).



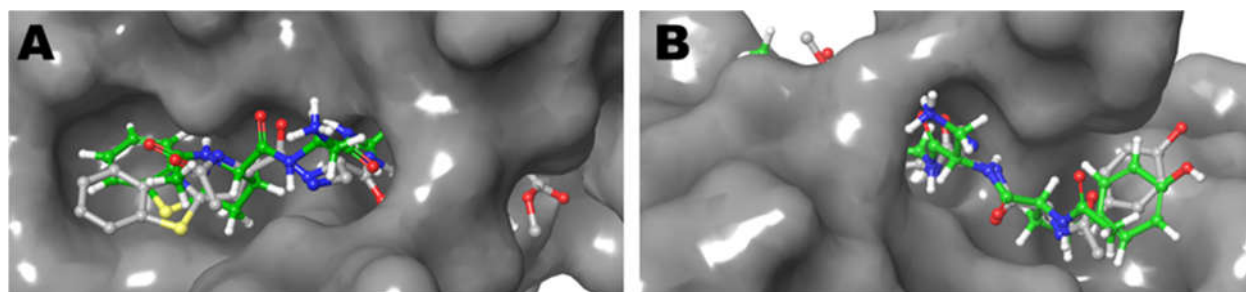

**Figure S21.** Cov-2-PLpro with its inhibitors in the X-ray structures (ligand carbon in grey) and refined with MD simulations (ligand carbon in green). A) 6WUU with peptide inhibitor **VIR250** and B) 6WX4 with peptide inhibitor **VIR251**.

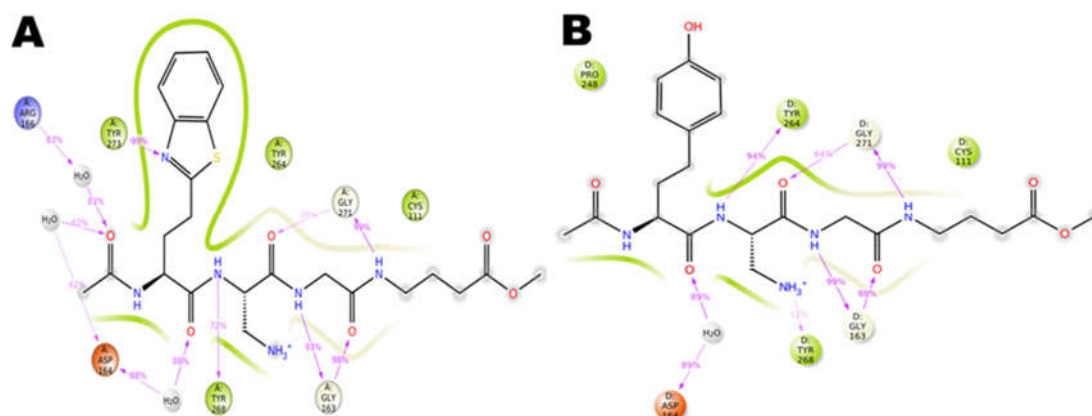

**Figure S22.** Dominating non-covalent protein-ligand interactions of the peptide inhibitors A) **VIR250**, B) **VIR251** with the PLpro SARS-CoV-2 during MD refinement simulations. Persistence of interactions is given in percent of simulation time.
